# Supplementary material
Source: HighWire-hosted journal article supplement (https://bmjopen.bmj.com/content/13/2/e065409)

**Supplemental figure 1:** flowchart of the selection of participants, baseline (2003-2006), first (2009-2012) and second (2014-2017) follow-ups of the CoLaus|PsyCoLaus study, Lausanne, Switzerland

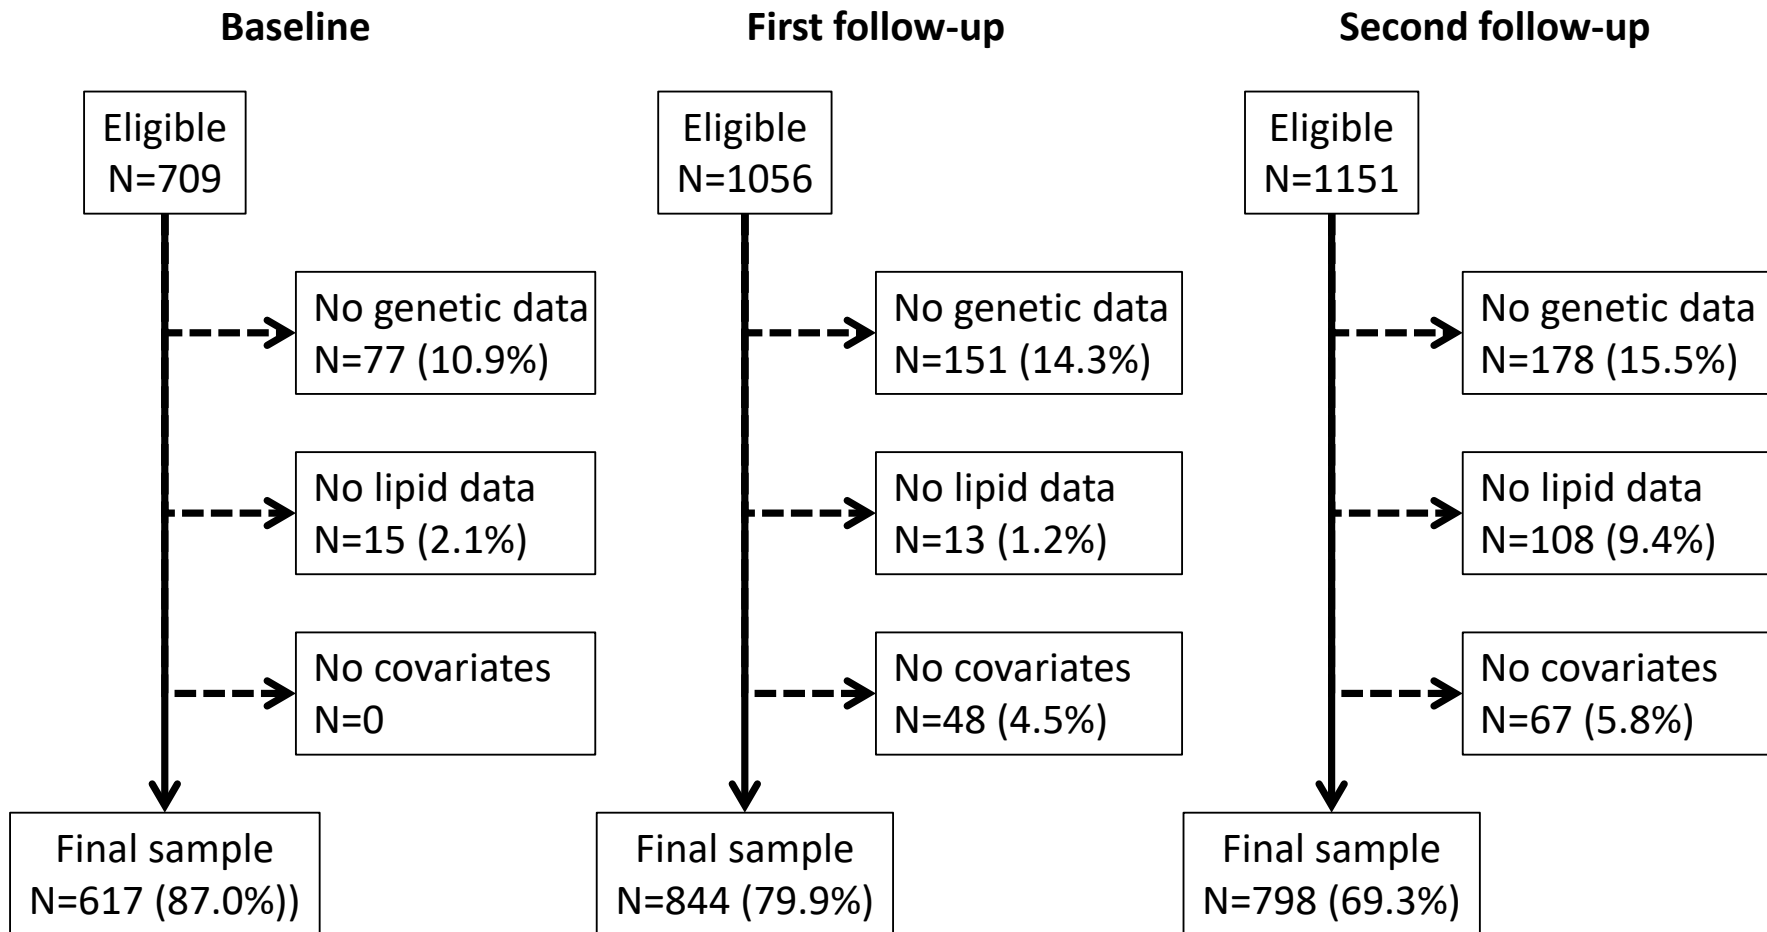

Supplement: inline-supplementary-material-2 [file inline-supplementary-material-2.pdf]
